# Supplementary material for: Diagnostic and prognostic value of quantitative detection of antimitochondrial antibodies subtype M2 using chemiluminescence immunoassay in primary biliary cholangitis
Source: publisher site journal article supplement (doi:10.1515/cclm-2023-0742), 2023-09-04
Supplement: Supplementary file 1 [file j_cclm-2023-0742_suppl_001.docx]

**Table S1:** Comparison of positivity using iFlash-AMA-M2 with other AMA detection methods across various cutoff values for iFlash-AMA-M2.

| iFlash-AMA-M2  AU/ml | IIF-AMA | | AMA-M2 (LIA) | | M2-3E (LIA) | | Total |
| --- | --- | --- | --- | --- | --- | --- | --- |
| negative | positive | negative | positive | negative | positive |
| < 16 | 66 | 10 | 76 | 0 | 72 | 4 | 76 |
| ≥ 16 | 13 | 89 | 43 | 59 | 7 | 95 | 102 |
| < 20 | 72 | 15 | 87 | 0 | 77 | 10 | 87 |
| ≥ 20 | 7 | 84 | 32 | 59 | 2 | 89 | 91 |
| < 24 | 74 | 24 | 98 | 0 | 77 | 21 | 98 |
| ≥ 24 | 5 | 75 | 21 | 59 | 2 | 78 | 80 |
| Total | 79 | 99 | 119 | 59 | 79 | 99 | 178 |

**Table S2:** Diagnostic performance of a single method for detecting AMA and the combination of multiple methods.

| Methods | Sensitivity (%) | Specificity (%) | Accuracy (%) |
| --- | --- | --- | --- |
| IIF-AMA | 62.7 | 100 | 66.9 |
| AMA-M2 (LIA) | 37.3 | 100 | 44.4 |
| M2-3E (LIA) | 62.0 | 95.0 | 65.7 |
| AMA-M2 (LIA) + M2-3E (LIA) | 63.3 | 95.0 | 66.9 |
| IIF-AMA +AMA-M2 (LIA) + M2-3E (LIA) | 67.7 | 95.0 | 70.8 |
| iFlash-AMA-M2 a | 63.9 | 95.0 | 67.4 |
| iFlash-AMA-M2 b | 57.6 | 100 | 62.4 |
| iFlash-AMA-M2 c | 51.9 | 100 | 56.2 |
| iFlash-AMA-M2 a + All | 70.9 | 95.0 | 73.6 |
| iFlash-AMA-M2 b + All | 67.7 | 95.0 | 70.8 |
| iFlash-AMA-M2 c + All | 67.7 | 95.0 | 70.8 |

a cut-off value of 16 AU/mL; b cut-off value of 20 AU/mL; c cut-off value of 24 AU/mL; All = IIF-AMA +AMA-M2 (LIA) + M2-3E (LIA).


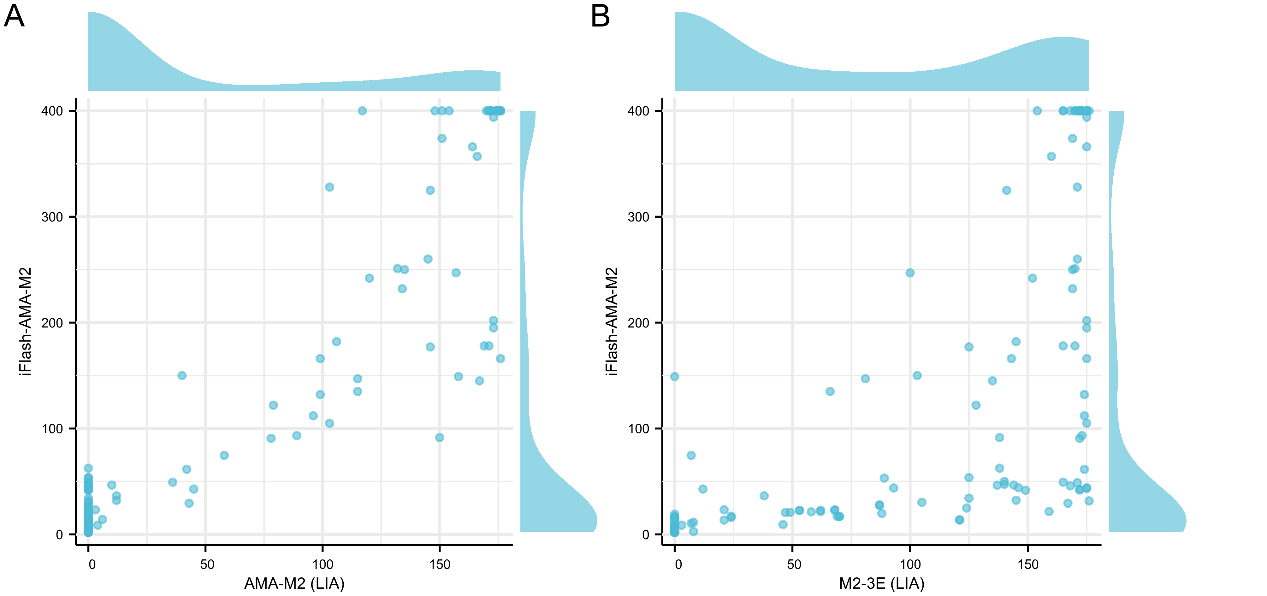


**Figure S1**: Scatter plots of the AMA-M2 detection by chemiluminescence immunoassay (AU/ml) and line immunoassay (signal intensity). A: iFlash-AMA-M2 and AMA-M2; B: iFlash-AMA-M2 and M2-3E.
